# Supplementary material for: New Perspectives on the Risks of Hydroxylated Polychlorinated Biphenyl (OH-PCB) Exposure: Intestinal Flora α-Glucosidase Inhibition
Source: MDPI journal article supplement (doi:10.3390/toxics12040237), 2024-03-24

## Supplementary Information

**Supplementary Figure S1** Kinetic parameters ( $K_m$ ,  $V_{max}$ ) of PNPG catalyzed by  $\alpha$ -glucosidase.

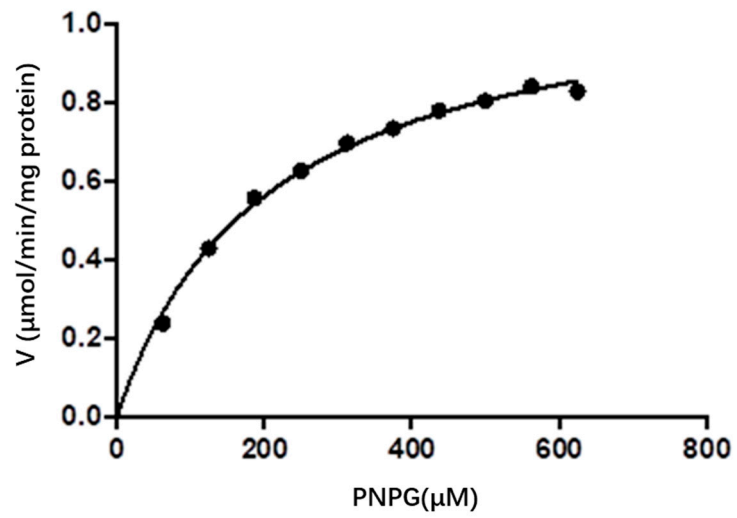

Supplement: s1 [file s1]
